# Supplementary material
Source: PubMed Central journal article supplement (PMC5597940)
Supplement: NIHMS901335-supplement-SI.pdf [file NIHMS901335-supplement-SI.pdf]

## Supporting Information

### Intrinsic and Stable Conjugation of Thiolated Mesoporous Silica

#### Nanoparticles with Radioarsenic

Paul A. Ellison<sup>†\*</sup><sup>◇</sup>, Feng Chen<sup>‡§◇</sup>, Shreya Goel<sup>||</sup>, Todd E. Barnhart<sup>†</sup>, Robert J Nickles<sup>†</sup>,  
Onofre T. DeJesus<sup>†</sup>, Weibo Cai<sup>†‡||‡</sup>

<sup>†</sup>Department of Medical Physics, <sup>‡</sup>Department of Radiology, University of Wisconsin School of Medicine and Public Health, Madison, WI, USA, <sup>§</sup>Current affiliation: Memorial Sloan Kettering Cancer Center, New York, NY, USA, <sup>||</sup>Materials Science Program and <sup>‡</sup>Carbone Cancer Center, University of Wisconsin, Madison, WI, USA

\*Corresponding author: *paellison@wisc.edu*

<sup>◇</sup>P.A.E. and F.C. contributed equally to this work.

**Equation S1:** Quantification of thiol groups per nanoparticle

The number of thiol groups per nanoparticle was empirically calculated from its experimentally measured properties using the following equation:

$$N_{SH/np} = N_{AV} \cdot \frac{[SH]}{[m]} \cdot \frac{\frac{4}{3}\pi r^3}{\left(\frac{1}{\rho_{Si}} + V_p\right)},$$

where:

$N_{AV}$  is Avagadro's number,

$[m]$  is the nanoparticle mass concentration in g/mL as determined by mass measurement of lyophilized sample,

$[SH]$  is the nanoparticle thiol concentration in nmol/mL as determined by Ellman's reagent quantification,

$\rho_{Si}$  is the density of silica (assumed to be 2.2 g/mL),

$V_p$  is the pore volume per gram of nanoparticles in cm<sup>3</sup>/g as determined by Brunauer-Emmet-Teller (BET) measurement,

$r$  is the nanoparticle radius in cm as determined by TEM measurement.

**Table S1.** Summary of decay properties, radionuclide production methods, and potential medical use of selected radioarsenic isotopes.

| isotope          | half-life (h) | decay properties <sup>a</sup>               | production method                                                  | medical use  | Most abundant $\gamma$ emissions' energy (keV) | Most abundant $\beta$ emissions' maximum energy (MeV) |
|------------------|---------------|---------------------------------------------|--------------------------------------------------------------------|--------------|------------------------------------------------|-------------------------------------------------------|
| <sup>71</sup> As | 65.30         | 28% $\beta^+$ ,<br>72% ec                   | Medical cyclotron                                                  | PET imaging  | 175 (82%)<br>1095 (4.1%)                       | 0.82 (28%, $\beta^+$ )                                |
| <sup>72</sup> As | 26.0          | 88% $\beta^+$ ,<br>12% ec                   | Medical cyclotron,<br><sup>72</sup> As/ <sup>72</sup> Se generator | PET imaging  | 834 (80%)<br>630 (7.9%)                        | 2.5 (64%, $\beta^+$ )<br>3.3 (16%, $\beta^+$ )        |
| <sup>74</sup> As | 426.5         | 29% $\beta^+$ ,<br>36% ec,<br>34% $\beta^-$ | Medical cyclotron                                                  | PET imaging  | 596 (59%)<br>635 (15%)                         | 0.94 (26%, $\beta^+$ )<br>0.72 (15%, $\beta^-$ )      |
| <sup>76</sup> As | 25.867        | 100% $\beta^-$                              | Medical cyclotron                                                  | Radiotherapy | 559 (45%)<br>657 (6.2%)                        | 3.0 (51%, $\beta^-$ )<br>2.4 (35%, $\beta^-$ )        |
| <sup>77</sup> As | 38.79         | 100% $\beta^-$                              | Medical cyclotron,<br>neutron capture                              | Radiotherapy | 239 (1.6%)<br>521 (0.56%)                      | 0.68 (97%, $\beta^-$ )<br>0.44 (1.6%, $\beta^-$ )     |

<sup>a</sup> $\beta^+$ : positron emission, ec: electron capture,  $\beta^-$ : electron emission.

**Table S2.** Quantification of PET results shown in Figures 6 and 7 for three ROIs of interest (liver, spleen, and bladder).

| %ID/g (n = 3) |         | Free *As    | *As-dSiO <sub>2</sub> | *As-MSN(3nm pores) | *As-MSN(5nm pores) |
|---------------|---------|-------------|-----------------------|--------------------|--------------------|
| 0.5 – 1 h     | Liver   | 7 ± 1       | 32 ± 3                | 34 ± 2             | 24 ± 1             |
|               | Spleen  | n/a         | 11 ± 3                | n/a                | 17 ± 5             |
|               | Bladder | 35 ± 2      | 4.3 ± 0.2             | 18 ± 12            | 5 ± 2              |
| 3 – 6 h       | Liver   | 1.1 ± 0.1   | 29 ± 2                | 34 ± 2             | 23 ± 2             |
|               | Spleen  | n/a         | 10 ± 1                | n/a                | 18 ± 5             |
|               | Bladder | 45 ± 63     | 4 ± 4                 | 23 ± 9             | 5 ± 4              |
| ~1 d          | Liver   | 0.09 ± 0.02 | 27 ± 1                | 27 ± 4             | 23 ± 1             |
|               | Spleen  | n/a         | 8 ± 2                 | n/a                | 24 ± 6             |
|               | Bladder | 2 ± 1       | 5 ± 4                 | 8 ± 6              | 3 ± 2              |
| ~3 d          | Liver   | n/a         | 26 ± 1                | 20 ± 3             | 27 ± 2             |
|               | Spleen  | n/a         | 10 ± 2                | n/a                | 36 ± 8             |
|               | Bladder | n/a         | 4.0 ± 0.9             | 4 ± 1              | 2.8 ± 0.6          |
| ~5 d          | Liver   | n/a         | 23 ± 3                | 15 ± 1             | 30 ± 1             |
|               | Spleen  | n/a         | 11 ± 3                | n/a                | 38 ± 6             |
|               | Bladder | n/a         | 5 ± 2                 | 2 ± 1              | 2.4 ± 0.6          |
| ~7 d          | Liver   | n/a         | 21 ± 6                | 14 ± 2             | 30 ± 4             |
|               | Spleen  | n/a         | 11 ± 2                | n/a                | 45 ± 10            |
|               | Bladder | n/a         | 3.8 ± 0.5             | 1.4 ± 0.8          | 1.4 ± 0.9          |

**Table S3.** Quantification of 7 day post-injection *ex vivo* biodistribution shown in Figures 7d.

| <b>%ID/g (n = 3)</b> | <b>*As-dSiO<sub>2</sub></b> | <b>*As-MSN<br/>(3nm pores)</b> | <b>*As-MSN<br/>(5nm pores)</b> |
|----------------------|-----------------------------|--------------------------------|--------------------------------|
| Blood                | 0.0 ± 0.2                   | 0.02 ± 0.01                    | 0.1 ± 0.2                      |
| Skin                 | 0.17 ± 0.02                 | 1.0 ± 0.4                      | 0.3 ± 0.1                      |
| Muscle               | 0.03 ± 0.02                 | 0.016 ± 0.004                  | 0.1 ± 0.1                      |
| Bone                 | 0.3 ± 0.2                   | 0.21 ± 0.04                    | 1.2 ± 0.5                      |
| Heart                | 0.07 ± 0.02                 | 0.03 ± 0.01                    | 0.3 ± 0.3                      |
| Lung                 | 1.6 ± 1.4                   | 0.25 ± 0.07                    | 3 ± 2                          |
| Liver                | 15 ± 2                      | 25 ± 3                         | 35 ± 10                        |
| Kidney               | 0.089 ± 0.005               | 0.06 ± 0.02                    | 0.08 ± 0.02                    |
| Spleen               | 28 ± 6                      | 18 ± 9                         | 110 ± 70                       |
| Pancreas             | 0.04 ± 0.02                 | 0.03 ± 0.01                    | 0.2 ± 0.2                      |
| Stomach              | 0.20 ± 0.03                 | 0.05 ± 0.04                    | 0.1 ± 0.1                      |
| Intestine            | 0.18 ± 0.05                 | 0.06 ± 0.06                    | 0.08 ± 0.03                    |
| Tail                 | n/a                         | 0.2 ± 0.1                      | 4 ± 5                          |
| Brain                | 0.006 ± 0.001               | 0.03 ± 0.03                    | 0.1 ± 0.1                      |

T=21 °C

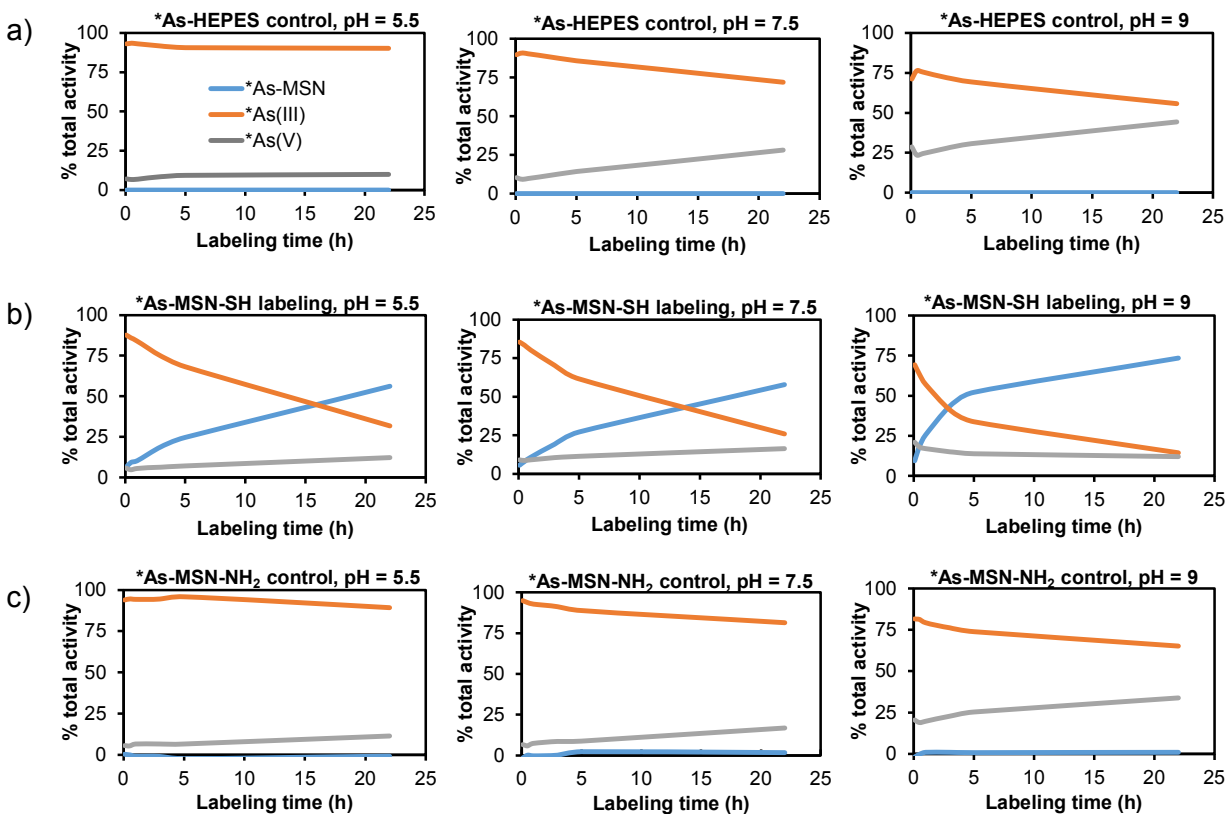

**Figure S1.** Results of radio-TLC analysis of <sup>75</sup>As(III) labeling at 21 °C and pH 5.5 (left), 7.5 (middle), or 9.5 (right) of (a) control vial containing only labeling medium (0.1 M HEPES, 0.5 M HA, 25 mM EDTA), (b) 600 nmol (-SH)/mL MSN(3nm pores)-SH in 0.1 M HEPES, 70 mM HA, 3 mM EDTA solutions, and (c) 520 nmol(-NH<sub>2</sub>)/mL MSN(3nm)-NH<sub>2</sub> in 0.1 M HEPES, 70 mM HA, 3 mM EDTA solutions. Radio-TLC quantification methods resulted in high uncertainty in solutions containing nearly 0% <sup>75</sup>As(III) and nearly 100% <sup>75</sup>As(V).

T=80 °C

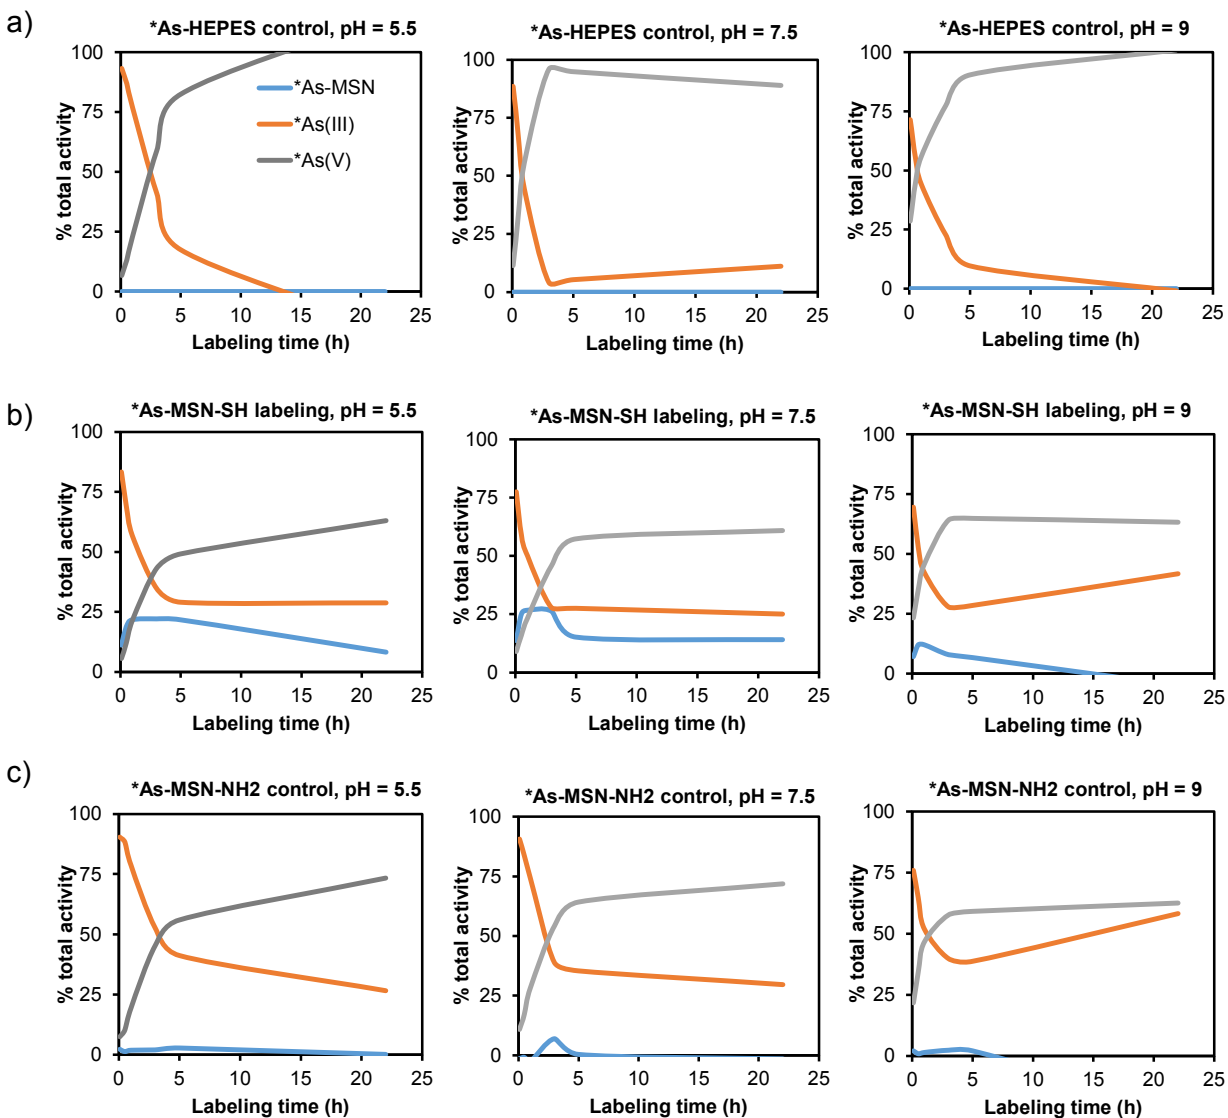

**Figure S2.** Results of radio-TLC analysis of  $^{75}\text{As(III)}$  labeling at 80 °C and pH 5.5 (left), 7.5 (middle), or 9.5 (right) of (a) control vial containing only labeling medium (0.1 M HEPES, 0.5 M HA, 25 mM EDTA), (b) 600 nmol (-SH)/mL MSN(3nm pores)-SH in 0.1 M HEPES, 70 mM HA, 3 mM EDTA solutions, and (c) 520 nmol(-NH<sub>2</sub>)/mL MSN(3nm)-NH<sub>2</sub> in 0.1 M HEPES, 70 mM HA, 3 mM EDTA solutions. Radio-TLC quantification methods resulted in high uncertainty in solutions containing nearly 0%  $^{75}\text{As(III)}$  and nearly 100%  $^{75}\text{As(V)}$ .

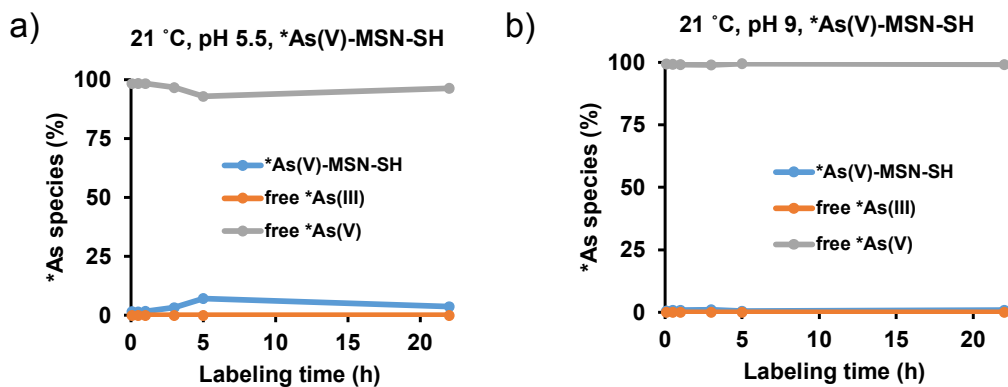

**Figure S3.** Results of radio-TLC analysis of  $^{75}\text{As(V)}$  labeling at 21 °C of 490 nmol(-SH)/mL MSN(3nm)-SH in 0.1 M HEPES, 0.14 M HA, 7 mM EDTA solutions at (a) pH 5.5 and (b) pH 9. Radio-TLC quantification methods resulted in high uncertainty in solutions containing nearly 0%  $^{75}\text{As(III)}$  or  $^{75}\text{As-MSN}$  and nearly 100%  $^{75}\text{As(V)}$ .
